# Supplementary material for: Analyzing the mechanism by which oyster peptides target IL-2 in melanoma cell apoptosis based on RNA-seq and m6A-seq
Source: Royal Society of Chemistry journal article supplement (doi:10.1039/d2fo03672j), 2023-01-01
Supplement: d2fo03672j1.pdf [file d2fo03672j1.pdf]

1 **Analyzing the mechanism by which oyster peptides target IL-2 in**  
2 **melanoma cell apoptosis based on RNA-seq and m6A-seq**

3

4 Jiaojiao Han<sup>a,b</sup>, Lingxin Geng<sup>a,b</sup>, Chenyang Lu<sup>a,b</sup>, Jun Zhou<sup>a,b</sup>, Ye Lijia<sup>a,b</sup>,  
5 Tinghong Ming<sup>a,b</sup>, Zhen Zhang<sup>a,b</sup>, Xiurong Su<sup>\*a,b</sup>

6 <sup>a</sup> State Key Laboratory for Managing Biotic and Chemical Threats to the Quality  
7 and Safety of Agro-products, Ningbo University, Ningbo, China

8 <sup>b</sup> School of Marine Science, Ningbo University, Ningbo, China

9

10 \* Corresponding author

11 Dr. Xiurong Su

12 School of Marine Science, Ningbo University, 818 Fenghua Road, Ningbo,  
13 China

14 Tel/Fax: +86 574 87608368

15 E-mail address: [suxiurong\\_pub1ic@163.com](mailto:suxiurong_pub1ic@163.com)

16

17

18

19

20

21

22

23

24

## Table Legend

**Table S1.** Sequences of the primers used for qRT-PCR analysis.

| Gene            | Forward primer         | Reverse primer          |
|-----------------|------------------------|-------------------------|
| <i>Bak</i>      | GGTGAGTATCCAAGGACTGCAA | GATGGGACCATTGCCCAAGT    |
| <i>Bad</i>      | AGAGTTTGAGCCGAGTGAGC   | ATGATGGCTGCTGCTGGTT     |
| <i>Cct6</i>     | AGACCCGGATAGTTCCTCCC   | TCTAGGATGAAGGCCCATTTTCG |
| <i>Pak4</i>     | CACTTCTGTCCCACCAGCAT   | CCCATCTTTGGCACCTTTGC    |
| <i>Rasa2</i>    | TACCACAAACAGCCAGAGTTCA | CTCCTGACAGCAGAGCCAAT    |
| <i>Gbp2</i>     | GCTGGCTGGGAAGAAAAACG   | ATGGCCAAGGCAAAGATCCA    |
| <i>Cdk2</i>     | GACACGCTGCTGGATGTCA    | CAGAAAGCTAGGCCCTGGAG    |
| <i>Tlr4</i>     | TGCCGTTTTATCACGGAGGT   | AAAGGCTCCCAGGGCTAAAC    |
| <i>Pcna</i>     | GTAGCAGAGTGGTCGTTGTCTT | CCAAAGAGACGTGGGACGAG    |
| <i>Ncbp2</i>    | GAAATCCGCAAACGCCAAGT   | TTCATTGTCACCCTCTCGGC    |
| <i>Pkm</i>      | GTACCATTGTACCATGCGGAGA | GTAGGCGTTATCCAGCGTGA    |
| <i>Hsp90ab1</i> | GGGTATCGGAAAGCAAGCCT   | AGCGAATCTTGTCCAAGGCA    |
| <i>Myh9</i>     | GTGAAACTCCCACCCTACCC   | CCAATCTGGTTCCCGACGAT    |

**Table S2.** Peptide sequences identified by MALDI-TOF/TOF-MS.

| Peptide sequence | Peptide expected<br>Mr | Peptide calculated<br>Mr | Peptide score | Relative abundance (%) | Protein description |
|------------------|------------------------|--------------------------|---------------|------------------------|---------------------|
|------------------|------------------------|--------------------------|---------------|------------------------|---------------------|

|              |           |           |       |       |                                                                        |
|--------------|-----------|-----------|-------|-------|------------------------------------------------------------------------|
| RGITG        | 502.2599  | 502.2863  | 12.93 | 23.73 | collagen alpha-1(IX) chain-like isoform X1                             |
| PSGCAP       | 531.2629  | 530.2159  | 17.97 | 20.29 | transferrin, partial                                                   |
| PGVGMS       | 546.2948  | 546.2472  | 32.53 | 33.01 | endothelial PAS domain-containing protein 1                            |
| GPVGAPG      | 553.2948  | 553.286   | 26.89 | 25.12 | collagen alpha-1(XXVII) chain B-like                                   |
| GPGVPK       | 554.3011  | 553.3224  | 20.06 | 33.27 | titin isoform b, partial                                               |
| KVGPLG       | 569.2999  | 569.3537  | 26.53 | 18.48 | ankyrin repeat and SAM domain-containing protein 1A-like<br>isoform X2 |
| GGVPLQ       | 570.2982  | 569.3173  | 18.72 | 17.22 | G-protein-coupled receptor GPR34 type 2a                               |
| PSPGNPG      | 624.3092  | 624.2867  | 30.6  | 25.72 | transcription factor SOX-21                                            |
| GLIWR        | 644.3278  | 643.3806  | 27.83 | 26.61 | estrogen receptor alpha                                                |
| GLLVLLPA     | 795.3912  | 794.5266  | 31.55 | 24.14 | MHC class Ia antigen                                                   |
| VNPELPR      | 824.8842  | 823.8907  | 25.13 | 36.97 | uncharacterized protein LOC105334086                                   |
| RGPPKGIL     | 836.4139  | 836.5232  | 43.13 | 23.22 | fidgetin-like protein 1                                                |
| ILADSAPR     | 842.6676  | 841.6603  | 30.74 | 45.84 | uncharacterized protein LOC105336797                                   |
| NCPAVPTVR    | 957.6548  | 956.6621  | 23.06 | 35.46 | uncharacterized protein LOC105325428                                   |
| ADRNNLPVLEA  | 1211.5573 | 1210.6306 | 12.72 | 14.86 | CYP1A                                                                  |
| VSQGQPTLVIME | 1301.5593 | 1300.6697 | 19.49 | 27.66 | insulin-like growth factor I receptor 1a                               |

|                  |           |           |       |       |                                       |
|------------------|-----------|-----------|-------|-------|---------------------------------------|
| PPTGITTLDPFEVP   | 1483.6652 | 1482.7606 | 19.56 | 28.46 | putative cytochrome oxidase subunit 3 |
| LGAGHILQNDLLPIIS | 1673.7651 | 1672.9512 | 20.6  | 23.08 | timeless                              |

**Table S3.** The results of potential targets screening with high fit values by Discovery Studio 2018.

| Peptide  | PDB ID | Pharmacophore                           | Fit Value | Biological function                                                                                                                |
|----------|--------|-----------------------------------------|-----------|------------------------------------------------------------------------------------------------------------------------------------|
|          | 1tqf   | Beta-secretase 1                        | 3.0449    | Responsible for the proteolytic processing of the amyloid precursor protein                                                        |
|          | 1t5c   | Centromeric protein E                   | 3.0486    | Plays an important role in chromosome congression, microtubule-kinetochore conjugation and spindle assembly checkpoint activation. |
|          | 1srg   | Streptavidin                            | 3.0659    | Forms a strong non-covalent specific complex with biotin                                                                           |
|          | 1jj7   | Peptide transporter TAP1                | 3.0747    | ABC transporter associated with antigen processing                                                                                 |
|          | 1f5v   | Oxygen insensitive NADPH nitroreductase | 3.0850    | Catalyzes the reduction of nitroaromatic compounds using NADPH                                                                     |
| ILADSAPR | 1coy   | Cholesterol Oxidase                     | 3.1515    | Catalyzes the oxidation and isomerization of cholesterol to cholestenone                                                           |

|       |      |                            |        |                                                                                                                                                           |
|-------|------|----------------------------|--------|-----------------------------------------------------------------------------------------------------------------------------------------------------------|
|       | 1amw | Heat Shock Protein 90      | 3.2056 | Promotes the maturation, structural maintenance and proper regulation of specific target proteins involved in cell cycle control and signal transduction. |
|       | 1a4h | Heat Shock Protein 90      | 3.2556 | Promotes the maturation, structural maintenance and proper regulation of specific target proteins involved in cell cycle control and signal transduction. |
|       | 1M48 | Interleukin-2              | 3.4923 | Play pivotal roles in the immune response and tolerance                                                                                                   |
| □     | 1a0i | DNA ligase                 | 3.5186 | Seals nicks in double-stranded DNA during DNA replication, DNA recombination and DNA repair in an ATP-dependent reaction                                  |
| <hr/> |      |                            |        |                                                                                                                                                           |
|       | 3cyq | Chemotaxis protein motB    | 3.0483 | MotA and MotB comprise the stator element of the flagellar motor complex                                                                                  |
|       | 2iyI | Cell division protein ftsy | 3.0867 | Involved in targeting and insertion of nascent membrane proteins into the cytoplasmic membrane                                                            |
|       | 1uk4 | 3C-like proteinase         | 3.1484 | Contains the proteinases responsible for the cleavages of the polyprotein.                                                                                |

|         |      |                                               |        |                                                                                                  |
|---------|------|-----------------------------------------------|--------|--------------------------------------------------------------------------------------------------|
|         | 3beg | Serine/threonine-protein kinase<br>SRPK1      | 3.1521 | Plays a central role in the regulatory network for<br>splicing                                   |
| VNPFLPR | 2aio | Metallo-beta-lactamase L1                     | 3.1762 | Antibiotic resistance                                                                            |
|         | 2orj | Pulmonary surfactant-<br>associated protein D | 3.1842 | Contributes to the lung's defense against inhaled<br>microorganisms, organic antigens and toxins |
|         | 3d9m | RNA-binding protein 16                        | 3.4769 | Anti-terminator protein required to prevent early mRNA<br>termination during transcription       |
|         | 2gz7 | Replicase polyprotein 1ab                     | 3.4800 | Multifunctional protein involved in the transcription and<br>replication of viral RNAs           |
|         | 1w51 | Beta-secretase 1                              | 3.6149 | Responsible for the proteolytic processing of the<br>amyloid precursor protein                   |
| □       | 1M48 | Interleukin-2                                 | 3.6568 | Play pivotal roles in the immune response and<br>tolerance                                       |
|         | 1tyr | Transthyretin                                 | 3.0356 | Thyroid hormone-binding protein                                                                  |
|         | 1tqf | Beta-secretase 1                              | 3.0431 | Responsible for the proteolytic processing of the<br>amyloid precursor protein                   |
|         | 1uk4 | 3C-like proteinase                            | 3.1096 | Contains the proteinases responsible for the cleavages                                           |

|           |      |                                         |        |                                                                                                                                                           |
|-----------|------|-----------------------------------------|--------|-----------------------------------------------------------------------------------------------------------------------------------------------------------|
|           |      |                                         |        | of the polyprotein.                                                                                                                                       |
|           |      |                                         |        | Promotes the maturation, structural maintenance and proper regulation of specific target proteins involved in cell cycle control and signal transduction. |
|           | 1a4h | Heat Shock Protein 90                   | 3.1253 |                                                                                                                                                           |
|           | 1jj7 | Peptide transporter TAP1                | 3.1923 | ABC transporter associated with antigen processing                                                                                                        |
| NCPAVPTVR | 1f5v | Oxygen insensitive NADPH nitroreductase | 3.4303 | Catalyzes the reduction of nitroaromatic compounds using NADPH                                                                                            |
|           | 1t5c | Centromeric protein E                   | 3.4844 | Plays an important role in chromosome congression, microtubule-kinetochore conjugation and spindle assembly checkpoint activation                         |
|           | 1M48 | Interleukin-2                           | 3.5568 | Play pivotal roles in the immune response and tolerance                                                                                                   |
|           | 3iay | DNA polymerase delta catalytic subunit  | 3.5656 | Participates in chromosomal DNA replication                                                                                                               |
| □         | 3lbi | GTPase HRas                             | 3.6358 | Involved in the activation of Ras protein signal transduction                                                                                             |

**Table S4.** The reversing docking results of other peptides.

| Peptide | PDB ID | Pharmacophore                              | Fit Value | Biological function                                                                                                                                                         |
|---------|--------|--------------------------------------------|-----------|-----------------------------------------------------------------------------------------------------------------------------------------------------------------------------|
| RGITG   | 1uk4   | 3C-like proteinase                         | 3.0524    | Contains the proteinases responsible for the cleavages of the polyprotein                                                                                                   |
|         | 2gz7   | Replicase polyprotein 1ab                  | 3.1611    | Multifunctional protein involved in the transcription and replication of viral RNAs                                                                                         |
|         | 2orj   | Pulmonary surfactant-associated protein D  | 2.9683    | Contributes to the lung's defense against inhaled microorganisms, organic antigens and toxins                                                                               |
|         | 2of4   | Proto-oncogene tyrosine-protein kinase LCK | 3.0181    | Non-receptor tyrosine-protein kinase that plays an essential role in the selection and maturation of developing T-cells in the thymus and in the function of mature T-cells |
|         | 3i81   | Insulin-like growth factor 1 recepto       | 2.9472    | Receptor tyrosine kinase which mediates actions of insulin-like growth factor 1 (IGF1)                                                                                      |
| PSGCAP  | 3nw6   | Insulin-like growth factor                 | 3.1479    | Receptor tyrosine                                                                                                                                                           |



|        |      |                                                                        |        |                                                                                                                                     |
|--------|------|------------------------------------------------------------------------|--------|-------------------------------------------------------------------------------------------------------------------------------------|
|        |      | 1 receptor                                                             |        | kinase which mediates actions of insulin-like growth factor 1 (IGF1)                                                                |
|        | 3o95 | Dipeptidyl peptidase 4                                                 | 2.8874 | Its interaction with ADA also regulates lymphocyte-epithelial cell adhesion                                                         |
|        | 1y6a | Vascular endothelial growth factor receptor 2                          | 2.9063 | Plays an essential role in the regulation of angiogenesis, vascular development, vascular permeability, and embryonic hematopoiesis |
|        | 1mmp | Matrilysin                                                             | 3.0432 | Activates procollagenase                                                                                                            |
|        | 1fkh | Peptidyl-prolyl cis-trans isomerase FKBP1A                             | 3.0785 | It catalyzes the cis-trans isomerization of proline imidic peptide bonds in oligopeptides                                           |
| PGVGMS | 4drq | Peptidyl-prolyl cis-trans isomerase FKBP5                              | 2.8958 | Immunophilin protein with PPIase and co-chaperone activities                                                                        |
|        | 2wxq | Phosphatidylinositol 4,5-bisphosphate 3-kinase catalytic subunit delta | 3.1234 | Uses ATP and PtdIns(4,5)P2 (phosphatidylinositol                                                                                    |

|         |      |                                               |        |                                                                                                             |
|---------|------|-----------------------------------------------|--------|-------------------------------------------------------------------------------------------------------------|
|         |      | isoform                                       |        | 4,5-bisphosphate) to generate phosphatidylinositol 3,4,5-trisphosphate (PIP3)                               |
|         | 1yw2 | Mitogen-activated protein kinase 14           | 2.9688 | Serine/threonine kinase which acts as an essential component of the MAP kinase signal transduction pathway. |
|         | 2c5x | Cyclin-dependent kinase 2                     | 3.0448 | Serine/threonine-protein kinase involved in the control of the cell cycle                                   |
|         | 3rwp | 3-phosphoinositide-dependent protein kinase 1 | 2.9018 | Isoform 3 is catalytically inactive                                                                         |
|         | 4erk | Mitogen-activated protein kinase 1            | 3.02   | Transcriptional activity is independent of kinase activity                                                  |
| GPVGAPG | 4dfn | Tyrosine-protein kinase SYK                   | 3.0718 | Regulates neutrophil degranulation and phagocytosis through activation of the MAPK signaling cascade        |
|         | 4djh | Kappa-type opioid receptor, Lysozyme          | 3.1424 | Play a role in arousal and regulation of                                                                    |

|        |      |                                            |        |                                                                                                                                                 |
|--------|------|--------------------------------------------|--------|-------------------------------------------------------------------------------------------------------------------------------------------------|
|        |      |                                            |        | autonomic and neuroendocrine functions                                                                                                          |
|        | 1ypl | thrombin light chain                       | 2.9817 | Functions in blood homeostasis, inflammation and wound healing                                                                                  |
|        | 2ab2 | Mineralocorticoid receptor                 | 3.0649 | The effect of MC is to increase ion and water transport and thus raise extracellular fluid volume and blood pressure and lower potassium levels |
| GPGVPK | 1pe5 | Thermolysin                                | 2.9676 | Extracellular zinc metalloprotease                                                                                                              |
|        | 1rq9 | protease                                   | 3.0357 | Showing features for domain                                                                                                                     |
|        | 3oqk | Renin                                      | 3.0608 | Renin is a highly specific endopeptidase                                                                                                        |
|        | 3uqf | Proto-oncogene tyrosine-protein kinase Src | 3.1464 | Non-receptor protein tyrosine kinase                                                                                                            |
|        | 1gbn | Ornithine aminotransferase, mitochondrial  | 2.9322 | Catalyzes the reversible interconversion of L-ornithine and 2-                                                                                  |

|        |      |                                                 |               |                                                                                                              |
|--------|------|-------------------------------------------------|---------------|--------------------------------------------------------------------------------------------------------------|
|        |      |                                                 |               | oxoglutarate to L-glutamate semialdehyde and L-glutamate                                                     |
| KVGPLG | 1qpd | LCK Kinase                                      | 3.094<br>2.92 | Interacts with FYB2<br>Plays a key role in T-cell antigen receptor (TCR)-linked signal transduction pathways |
|        | 3mpm | Tyrosine-protein kinase Lck                     |               | Confers resistance to the different beta-lactams antibiotics                                                 |
|        | 2aio | Metallo-beta-lactamase L1                       | 3.002         | A receptor for fibronectin and fibrinogen                                                                    |
|        | 3vi4 | Integrin alpha-5                                | 3.1025        | Activates several signaling pathways in response to ligand binding, including the ERK1/2 and the JNK pathway |
|        | 2i0v | cFMS tyrosine kinase                            | 3.0284        |                                                                                                              |
| GGVPLQ | 2i1m | Macrophage colony-stimulating factor 1 receptor | 3.0743        | Promotes the release of pro-inflammatory chemokines in response to IL34 and CSF1                             |
|        | 3dpk | Fibroblast growth factor receptor 1             | 3.0377        | Tyrosine-protein kinase                                                                                      |

|         |      |                                       |        |                                                                                                                                                                                                                                |
|---------|------|---------------------------------------|--------|--------------------------------------------------------------------------------------------------------------------------------------------------------------------------------------------------------------------------------|
|         | 3g0e | Mast/stem cell growth factor receptor | 3.079  | In response to KITLG/SCF binding, KIT can activate several signaling pathways<br>Integrin ITGAL/ITGB2 is a receptor for F11R<br>Play a role in the contractions of the heart, gut and testes, and in spermatid differentiation |
|         | 1cqp | Integrin alpha-L                      | 2.8869 |                                                                                                                                                                                                                                |
|         | 2xhm | Angiotensin-converting enzyme         | 3.0432 |                                                                                                                                                                                                                                |
| PSPGNPG | 2wqb | Angiopoietin-1 receptor               | 3.0622 | Required for normal angiogenesis and heart development during embryogenesis                                                                                                                                                    |
|         | 2xba | ALK tyrosine kinase receptor          | 2.8975 | Plays an important role in the genesis and differentiation of the nervous system                                                                                                                                               |
|         | 2hha | Hypothetical protein DPP4             | 3.0769 | Cell surface glycoprotein receptor involved in the costimulatory signal essential for T-cell receptor (TCR)-mediated T-cell                                                                                                    |
|         |      |                                       |        |                                                                                                                                                                                                                                |

|       |      |                                      |        |                                                                                                                                                                            |
|-------|------|--------------------------------------|--------|----------------------------------------------------------------------------------------------------------------------------------------------------------------------------|
|       | 2ogz | Dipeptidyl peptidase                 | 3.2137 | activation<br>Cell surface<br>glycoprotein receptor<br>involved in the<br>costimulatory signal<br>essential for T-cell<br>receptor (TCR)-<br>mediated T-cell<br>activation |
|       | 2vdm | Integrin alpha-IIb                   | 3.1919 | Integrin alpha-IIb/beta-3<br>is a receptor for<br>fibronectin, fibrinogen,<br>plasminogen,<br>prothrombin,<br>thrombospondin and<br>vitronectin                            |
| GLIWR | 1r0p | Hepatocyte growth<br>factor receptor | 3.1734 | Receptor tyrosine<br>kinase that transduces<br>signals from the<br>extracellular matrix into<br>the cytoplasm by<br>binding to hepatocyte<br>growth factor/HGF<br>ligand   |
|       | 1u59 | Tyrosine-protein kinase<br>ZAP-70    | 3.1027 | Tyrosine kinase that<br>plays an essential role                                                                                                                            |

|          |      |                                     |        |                                                                                                                                              |
|----------|------|-------------------------------------|--------|----------------------------------------------------------------------------------------------------------------------------------------------|
|          | 1sx3 | groEL protein                       | 3.0813 | in regulation of the adaptive immune response<br>Together with its co-chaperonin GroES, plays an essential role in assisting protein folding |
|          | 1qy8 | Endoplasmin                         | 3.1016 | Molecular chaperone that functions in the processing and transport of secreted proteins                                                      |
|          | 1tu6 | Cathepsin K                         | 2.9528 | Thiol protease involved in osteoclastic bone resorption and may participate partially in the disorder of bone remodeling                     |
| GLLVLLPA | 1zxn | DNA topoisomerase II, alpha isozyme | 3.04   | Key decatenating enzyme that alters DNA topology by binding to two double-stranded DNA molecules                                             |
|          | 3svh | CREB-binding protein                | 2.9566 | Acetylates histones, giving a specific tag for                                                                                               |

|          |      |                                                           |        |                                                                                                                                                                        |
|----------|------|-----------------------------------------------------------|--------|------------------------------------------------------------------------------------------------------------------------------------------------------------------------|
|          | 2w5y | Histone-lysine N-methyltransferase 2A                     | 2.9299 | transcriptional activation<br>Histone methyltransferase that plays an essential role in early development and hematopoiesis                                            |
|          | 3smr | WD repeat-containing protein 5                            | 3.004  | Contributes to histone modification                                                                                                                                    |
|          | 3ooi | Histone-lysine N-methyltransferase, H3 lysine-36 specific | 3.0954 | Histone methyltransferase that dimethylates Lys-36 of histone H3                                                                                                       |
|          | 3oxf | SET and MYND domain-containing protein 3                  | 3.0501 | Histone methyltransferase                                                                                                                                              |
|          | 3tg4 | N-lysine methyltransferase SMYD2                          | 2.9279 | The activity requires interaction with HSP90alpha                                                                                                                      |
| RGPPKGIL | 2itx | Epidermal growth factor receptor                          | 3.0129 | Receptor tyrosine kinase binding ligands of the EGF family and activating several signaling cascades to convert extracellular cues into appropriate cellular responses |



|             |      |                                                     |        |                                                                                                          |
|-------------|------|-----------------------------------------------------|--------|----------------------------------------------------------------------------------------------------------|
|             | 3bpr | Proto-oncogene tyrosine-protein kinase MER          | 3.0024 | Regulates many physiological processes including cell survival, migration                                |
|             | 3hng | Vascular endothelial growth factor receptor 1       | 3.024  | Acts as a positive regulator of postnatal retinal hyaloid vessel regression                              |
|             | 4aoj | High affinity nerve growth factor receptor          | 3.1059 | High affinity receptor for NGF which is its primary ligand                                               |
|             | 2ivv | Proto-oncogene tyrosine-protein kinase receptor Ret | 3.1074 | Involved in the development of enteric nervous system and renal organogenesis during embryonic life      |
| ADRNNLPVLEA | 3oom | Activin receptor type-1                             | 2.858  | Bone morphogenetic protein (BMP) type I receptor                                                         |
|             | 1py5 | TGF-beta receptor type I                            | 3.1671 | Transmembrane serine/threonine kinase forming with the TGF-beta type II serine/threonine kinase receptor |
|             | 3iod | Pantothenate                                        | 3.0875 | Catalyzes the                                                                                            |

|              |      | synthetase                  |        | condensation of pantoate with beta-alanine in an ATP-dependent reaction via a pantoyl-adenylate intermediate                         |
|--------------|------|-----------------------------|--------|--------------------------------------------------------------------------------------------------------------------------------------|
| VSQGQPTLVIME | 2wgs | Glutamine synthetase        | 3.07   | Involved in nitrogen metabolism via ammonium assimilation                                                                            |
|              | 1hon | Adenylosuccinate synthetase | 3.0185 | Plays an important role in the de novo pathway of purine nucleotide biosynthesis                                                     |
|              | 3gid | Acetyl-CoA carboxylase 2    | 3.0844 | Mitochondrial enzyme that catalyzes the carboxylation of acetyl-CoA to malonyl-CoA and plays a central role in fatty acid metabolism |
|              | 1tkg | Threonyl-tRNA synthetase    | 2.8855 | Catalyzes the attachment of threonine to tRNA(Thr) in a two-step reaction                                                            |
|              | 3qtc | Pyrrolysyl-tRNA synthetase  | 2.9573 | Catalyzes the attachment of pyrrolysine to tRNA(Pyl)                                                                                 |

|                  |      |                                              |        |                                                                                               |
|------------------|------|----------------------------------------------|--------|-----------------------------------------------------------------------------------------------|
| PPTGITTLDPFVEVP  | 1pg4 | acetyl-CoA synthetase                        | 2.9104 | Catalyzes the conversion of acetate into acetyl-CoA                                           |
|                  | 2b69 | UDP-glucuronate decarboxylase 1              | 2.993  | Catalyzes the NAD-dependent decarboxylation of UDP-glucuronic acid to UDP-xylose              |
|                  | 3h0w | S-adenosylmethionine decarboxylase proenzyme | 3.1292 | Essential for biosynthesis of the polyamines spermidine and spermine                          |
|                  | 1bn1 | Carbonic anhydrase 2                         | 3.1362 | Catalyzes the reversible hydration of carbon dioxide                                          |
|                  | 2orj | Pulmonary surfactant-associated protein D    | 2.9472 | Contributes to the lung's defense against inhaled microorganisms, organic antigens and toxins |
| LGAGHILQNDLLPIIS | 3lbj | Protein Mdm4                                 | 3.0879 | Along with MDM2, contributes to TP53 regulation                                               |
|                  | 2dq7 | Proto-oncogene tyrosine-protein kinase Fyn   | 3.0032 | Non-receptor tyrosine-protein kinase                                                          |
|                  | 1tyr | Transthyretin                                | 3.0489 | Thyroid hormone-                                                                              |

|  |      |                              |        |                                                                                                       |
|--|------|------------------------------|--------|-------------------------------------------------------------------------------------------------------|
|  | 2gz7 | Replicase polyprotein<br>1ab | 2.862  | binding protein<br>Contains the<br>proteinases responsible<br>for the cleavages of the<br>polyprotein |
|  | 1uk4 | 3C-like proteinase           | 3.0015 | Multifunctional protein<br>involved in the<br>transcription and<br>replication of viral RNAs          |

**Table S5.** The results of molecular docking.

| Name      | _CHARMm<br>Energy | Bond<br>Energy | Angle<br>Energy | _CDOCKER<br>ENERGY | _CDOCKER<br>INTERACTION<br>ENERGY | Electrostatic<br>Energy | Van der<br>Waals<br>Energy | POSE<br>NUMBER | RMS<br>Gradient |
|-----------|-------------------|----------------|-----------------|--------------------|-----------------------------------|-------------------------|----------------------------|----------------|-----------------|
| ILADSAPR  | -305.27           | 1.7578         | 25.9001         | 86.6552            | 74.9643                           | -341.453                | -<br>20.1163               | 1              | 0.00974         |
| NCPAVPTVR | -351.667          | 2.55349        | 35.3908         | 73.0932            | 67.1465                           | -402.267                | -                          | 1              | 0.00943         |

|         |          |         |         |         |         |          |         |   |         |
|---------|----------|---------|---------|---------|---------|----------|---------|---|---------|
|         |          |         |         |         |         |          | 23.0214 |   |         |
| VNPFLPR | -290.361 | 2.36685 | 32.7481 | 68.1828 | 71.7682 | -337.482 | -       | 1 | 0.00995 |
|         |          |         |         |         |         |          | 22.9434 |   |         |

**Table S6.** Abundance of differentially expressed gene in each group.

| Gene Name      | Log2(FC) value |          |      | Gene description                      |
|----------------|----------------|----------|------|---------------------------------------|
|                | control        | ILADSAPR | IL-2 |                                       |
| <i>Cct6</i>    | -1.35          | 0.86     | 0.39 | chaperonin containing Tcp1, subunit 6 |
| <i>Bad</i>     | -1.02          | 0.71     | 0.27 | BCL2-associated agonist of cell death |
| <i>Rasa2</i>   | -1.17          | 0.69     | 0.21 | RAS p21 protein activator 2           |
| <i>Gm10260</i> | -1.24          | 0.73     | 0.23 | predicted gene 10260                  |
| <i>Pcna</i>    | 1.21           | 0.55     | 0.43 | proliferating cell nuclear antigen    |
| <i>Gm28037</i> | -1.3           | 0.57     | 0.35 | predicted gene, 28037                 |
| <i>Zfp708</i>  | -1.27          | 0.42     | 0.59 | zinc finger protein 708               |
| <i>Pak4</i>    | -1.23          | 0.47     | 0.51 | p21 protein -activated kinase 4       |
| <i>Gbp2</i>    | -1.31          | 0.48     | 0.49 | guanylate binding protein 2           |
| <i>Cdk2</i>    | 1.26           | 0.48     | 0.47 | cyclin-dependent kinase 2             |

|                |       |       |       |                                       |
|----------------|-------|-------|-------|---------------------------------------|
| <i>Gm20521</i> | -0.72 | 0.5   | 0.46  | predicted gene 20521                  |
| <i>Ncbp2</i>   | 0.79  | -0.12 | -1.03 | nuclear cap binding protein subunit 2 |
| <i>Tlr4</i>    | 0.74  | -0.17 | -1.09 | toll-like receptor 4                  |
| <i>Zfp955B</i> | -0.38 | -0.14 | 1.11  | zinc finger protein 955B              |
| <i>Gm15850</i> | -0.36 | -0.16 | 1.28  | predicted gene 15850                  |
| <i>Gan</i>     | -0.34 | -0.43 | 1.26  | Gigaxonin                             |
| <i>Cdc14B</i>  | -0.21 | -0.39 | 1.26  | CDC14 cell division cycle 14B         |
| <i>Zfp157</i>  | -0.26 | -0.41 | 1.27  | zinc finger protein 157               |
| <i>Ppp1R26</i> | -0.27 | -0.47 | 1.24  | protein regulatory subunit 26         |
| <i>Gm42878</i> | -0.36 | -0.43 | 1.25  | predicted gene 42878                  |
| <i>Pou2F1</i>  | -0.31 | -0.44 | 1.31  | POU domain 2, transcription factor 1  |
| <i>Uhmk1</i>   | -0.32 | -0.46 | 1.3   | U2AF homology motif (UHM) kinase 1    |
| <i>Zfp966</i>  | -0.35 | -0.23 | 1.33  | zinc finger protein 966               |
| <i>Zfp82</i>   | -0.38 | -0.31 | 1.29  | zinc finger protein 82                |
| <i>Cpeb4</i>   | -0.33 | -0.39 | 1.24  | cytoplasmic polyadenylation element 4 |
| <i>Ddias</i>   | -0.34 | -0.36 | 1.24  | damage induced apoptosis suppressor   |
| <i>Em15</i>    | -0.34 | -0.36 | 1.3   | embrane protein 154                   |

|                 |       |       |      |                                         |
|-----------------|-------|-------|------|-----------------------------------------|
| <i>Chm</i>      | -0.27 | -0.32 | 1.34 | choroideremia                           |
| <i>Gm37034</i>  | -0.26 | -0.33 | 1.36 | predicted gene, 37034                   |
| <i>Bicd1</i>    | -0.27 | -0.31 | 1.31 | bicaudal D homolog 1                    |
| <i>Gm9958</i>   | -0.25 | -0.33 | 1.33 | predicted gene 9958                     |
| <i>Clock</i>    | -0.3  | -0.29 | 1.34 | circadian locomotor output cycles kaput |
| <i>Zbed6</i>    | -0.28 | -0.37 | 1.29 | zinc finger, BED type containing 6      |
| <i>Gm43980</i>  | -0.31 | -0.29 | 1.29 | predicted gene, 43980                   |
| <i>Pds5A</i>    | -0.29 | -0.27 | 1.4  | PDS5 cohesin associated factor A        |
| <i>Cep290</i>   | -0.4  | -0.3  | 1.35 | centrosomal protein 290                 |
| <i>Ankrd12</i>  | -0.43 | -0.34 | 1.37 | ankyrin repeat domain 12                |
| <i>Rictor</i>   | -0.44 | -0.36 | 1.41 | independent companion of MTOR           |
| <i>Nbeal1</i>   | -0.4  | -0.35 | 1.37 | neurobeachin like 1                     |
| <i>Kcnq1Ot1</i> | -0.42 | -0.33 | 1.25 | KCNQ1 overlapping transcript 1          |
| <i>Zc3H7A</i>   | -0.51 | -0.29 | 1.29 | zinc finger CCCH type containing 7 A    |
| <i>Myo9A</i>    | -0.47 | -0.3  | 1.26 | myosin IXa                              |
| <i>Polq</i>     | -0.49 | -0.33 | 1.31 | polymerase (DNA directed), theta        |
| <i>Cd2Ap</i>    | -0.52 | -0.33 | 1.33 | CD2-associated protein                  |

|                |       |       |      |                                         |
|----------------|-------|-------|------|-----------------------------------------|
| <i>Thoc2</i>   | -0.43 | -0.35 | 1.34 | THO complex 2                           |
| <i>Atrx</i>    | -0.44 | -0.37 | 1.3  | ATRX, chromatin remodeler               |
| <i>Prpf39</i>  | -0.43 | -0.38 | 1.26 | pre-mRNA processing factor 39           |
| <i>Tet2</i>    | -0.41 | -0.29 | 1.32 | tet methylcytosine dioxygenase 2        |
| <i>Rock2</i>   | -0.42 | -0.27 | 1.4  | Rho coiled containing protein kinase 2  |
| <i>Cenpe</i>   | -0.46 | -0.29 | 1.29 | centromere protein E                    |
| <i>Gm37494</i> | -0.55 | -0.3  | 1.24 | predicted gene, 37494                   |
| <i>Malat1</i>  | -0.55 | -0.33 | 1.25 | metastasis associated lung transcript 1 |
| <i>Ugg2</i>    | -0.46 | -0.31 | 1.23 | UDP glycoprotein glucosyl transferase 2 |
| <i>Upf2</i>    | -0.44 | -0.31 | 1.43 | UPF2 regulator                          |
| <i>Ap3M1</i>   | -0.47 | -0.35 | 1.41 | adaptor-related protein complex 3       |
| <i>Cenpf</i>   | -0.48 | -0.33 | 1.41 | centromere protein F                    |
| <i>Ino80D</i>  | -0.47 | -0.34 | 1.33 | INO80 complex subunit D                 |
| <i>Paxbp1</i>  | -0.48 | -0.26 | 1.35 | PAX3 and PAX7 binding protein 1         |
| <i>Smg1</i>    | -0.47 | -0.28 | 1.39 | SMG1 homolog                            |
| <i>Ago3</i>    | -0.52 | -0.3  | 1.38 | argonaute RISC catalytic subunit 3      |
| <i>Zfp329</i>  | -0.53 | -0.34 | 1.38 | zinc finger protein 329                 |



|                 |       |       |      |                                                      |
|-----------------|-------|-------|------|------------------------------------------------------|
| <i>Sacs</i>     | -0.55 | -0.33 | 1.4  | sacsin                                               |
| <i>Ccdc88A</i>  | -0.51 | -0.25 | 1.44 | coiled coil domain containing 88A                    |
| <i>Vps13A</i>   | -0.5  | -0.29 | 1.39 | vacuolar protein sorting 13A                         |
| <i>Rasa12</i>   | -0.49 | -0.27 | 1.25 | RAS protein activator like 2                         |
| <i>Firre</i>    | -0.44 | -0.31 | 1.29 | functional intergenic repeating element              |
| <i>Trpm7</i>    | -0.46 | -0.32 | 1.3  | transient receptor potential , member 7              |
| <i>Mdm4</i>     | -0.48 | -0.35 | 1.34 | mouse 3T3 cell double minute 4                       |
| <i>Zfx2Os</i>   | -0.47 | -0.3  | 1.33 | zinc finger homeobox 2, opposite strand              |
| <i>Casp82P2</i> | -0.47 | -0.35 | 1.41 | caspase 8 associated protein 2                       |
| <i>Tmem170B</i> | -0.51 | -0.29 | 1.44 | transmembrane protein 170B                           |
| <i>Zfp445</i>   | -0.53 | -0.37 | 1.35 | zinc finger protein 445                              |
| <i>Tmtc3</i>    | -0.47 | -0.28 | 1.36 | transmembrane tetratricopeptide containing 3         |
| <i>Bod1L</i>    | -0.49 | -0.3  | 1.4  | biorientation of chromosomes in cell division 1-like |
| <i>Taok1</i>    | -0.53 | -0.33 | 1.29 | TAO kinase 1                                         |
| <i>Ccdc18</i>   | -0.56 | -0.34 | 1.27 | coiled-coil domain containing 18                     |
| <i>Rif</i>      | -0.51 | -0.31 | 1.46 | replication timing regulatory factor                 |
| <i>Med13</i>    | -0.51 | -0.35 | 1.37 | mediator complex subunit 13                          |

|                |       |       |       |                                      |
|----------------|-------|-------|-------|--------------------------------------|
| <i>Pet117</i>  | -0.48 | -0.33 | 1.33  | PET117 homolog                       |
| <i>Gm14633</i> | -0.44 | -0.24 | 1.39  | predicted gene 14633                 |
| <i>Gdf1</i>    | -0.5  | -0.27 | 1.38  | growth differentiation factor 1      |
| <i>Rnf26</i>   | -0.51 | -0.26 | 1.28  | ring finger protein 26               |
| <i>Gm20708</i> | -0.53 | -0.31 | 1.35  | predicted gene 20708                 |
| <i>Gm21982</i> | 0.69  | -1.16 | 0.66  | predicted gene 21982                 |
| <i>Adat3</i>   | 0.72  | -1.22 | 0.69  | adenosine deaminase, tRNA-specific 3 |
| <i>Gm15107</i> | 0.73  | -1.21 | 0.71  | predicted gene 15107                 |
| <i>Pcdhgb1</i> | 0.68  | -1.19 | 0.69  | protocadherin gamma subfamily B, 1   |
| <i>Gm17028</i> | 1.13  | 0.34  | 0.31  | predicted gene 17028                 |
| <i>Gm21969</i> | 1.25  | -0.72 | 0.28  | predicted gene 21969                 |
| <i>Gm7293</i>  | 1.18  | -0.74 | -0.5  | predicted gene 7293                  |
| <i>Cd63</i>    | -0.44 | 1.25  | -0.41 | CD63 antigen                         |
| <i>Gm3174</i>  | -0.46 | 1.22  | -0.43 | predicted gene, 31748                |
| <i>Gm15093</i> | -0.43 | 1.23  | -0.41 | predicted gene 15093                 |
| <i>Gm4613</i>  | -0.47 | 1.19  | -0.44 | predicted gene 4613                  |
| <i>A13Rik</i>  | 0.33  | 1.3   | -1.17 | RIKEN cDNA gene                      |

|                 |       |       |       |                                       |
|-----------------|-------|-------|-------|---------------------------------------|
| <i>Usf2</i>     | 0.47  | 0.89  | -1.14 | upstream transcription factor 2       |
| <i>D9300</i>    | 0.62  | 0.64  | -1.21 | RIKEN cDNA 9300 gene                  |
| <i>Ac138284</i> | 0.67  | 0.61  | -1.23 | RIKEN cDNA 138284 gene                |
| <i>Bak</i>      | -0.72 | 0.58  | 1.17  | BCL2-antagonist/killer                |
| <i>Nfat5</i>    | 0.36  | 0.34  | -1.03 | nuclear factor of activated T cells 5 |
| <i>Rin1</i>     | -0.47 | 0.25  | -0.43 | Ras and Rab interactor-like           |
| <i>Hkdc1</i>    | -0.43 | -0.28 | 1.41  | hexokinase domain containing 1        |

**Table S7.** Summary of m6A peaks in B16 cells and distribution.

| Samples ID | m6A peaks | m6A related gene | % peaks in 5'UTR | % peaks in 3'UTR | % peaks in 1st Exon | % peaks in other Exon |
|------------|-----------|------------------|------------------|------------------|---------------------|-----------------------|
| control    | 21271     | 9001             | 14.2             | 51.35            | 4.66                | 29.79                 |
| ILADSAPR   | 23416     | 9593             | 13.74            | 49.55            | 4.99                | 31.72                 |
| IL-2       | 24140     | 9910             | 15.13            | 49.77            | 4.9                 | 30.21                 |

**Table S8.** The differential genes detected in the comparison between the control and ILADSAPR group analyzed jointly by RNA-

seq and M6A seq.

| Gene ID         | Gene Name     | Diff.log2.fc | m6A regulation | log2(fc) | pval | qval | Gene regulation | Description                             |
|-----------------|---------------|--------------|----------------|----------|------|------|-----------------|-----------------------------------------|
| ENSMUSG00000033 |               |              |                |          |      |      |                 |                                         |
| 364             | <i>Usp37</i>  | -0.59        | down           | -1.41    | 0.04 | 1    | down            | ubiquitin specific peptidase 37         |
| ENSMUSG00000006 |               |              |                |          |      |      |                 | translocated promoter region, nuclear   |
| 005             | <i>Tpr</i>    | -1.26        | down           | -1.50    | 0.03 | 1    | down            | basket protein                          |
| ENSMUSG00000057 |               |              |                |          |      |      |                 |                                         |
| 335             | <i>Cep170</i> | -1.79        | down           | -1.46    | 0.03 | 1    | down            | centrosomal protein 170                 |
| ENSMUSG00000043 |               |              |                |          |      | 0.8  |                 | UPF2 regulator of nonsense transcripts  |
| 241             | <i>Upf2</i>   | -2.70        | down           | -1.90    | 0.01 | 0    | down            | homolog (yeast)                         |
| ENSMUSG00000026 |               |              |                |          |      |      |                 | c-abl oncogene 1, non-receptor tyrosine |
| 842             | <i>Abl1</i>   | 0.31         | up             | -1.39    | 0.04 | 1    | down            | kinase                                  |
| ENSMUSG00000036 |               |              |                |          |      |      |                 |                                         |
| 202             | <i>Rif1</i>   | -2.93        | down           | -1.48    | 0.03 | 1    | down            | replication timing regulatory factor 1  |
| ENSMUSG00000074 | <i>Qser1</i>  | -1.48        | down           | -1.34    | 0.05 | 1    | down            | glutamine and serine rich 1             |

|                  |                  |       |      |       |      |     |      |   |                                            |
|------------------|------------------|-------|------|-------|------|-----|------|---|--------------------------------------------|
| 994              |                  |       |      |       |      |     |      |   |                                            |
| ENSMUSG000000035 |                  |       |      |       |      | 0.8 |      |   | SHC (Src homology 2 domain containing)     |
| 109              | <i>Shc4</i>      | -0.25 | down | -1.85 | 0.01 | 0   | down |   | family, member 4                           |
| ENSMUSG000000035 |                  |       |      |       |      |     |      |   |                                            |
| 093              | <i>Secisbp2l</i> | -1.63 | down | -1.50 | 0.03 | 1   | down |   | SECIS binding protein 2-like               |
| ENSMUSG000000045 |                  |       |      |       |      |     |      |   | ESF1 nucleolar pre-rRNA processing         |
| 624              | <i>Esf1</i>      | -2.01 | down | -1.45 | 0.03 | 1   | down |   | protein homolog                            |
| ENSMUSG000000028 |                  |       |      |       |      |     |      |   | zinc finger, RAN-binding domain containing |
| 180              | <i>Zranb2</i>    | -2.03 | down | -1.65 | 0.02 | 1   | down | 2 |                                            |
| ENSMUSG000000041 |                  |       |      |       |      | 0.8 |      |   |                                            |
| 734              | <i>Kirrel</i>    | 0.32  | up   | 1.83  | 0.01 | 0   | up   |   | kin of IRRE like (Drosophila)              |
| ENSMUSG000000039 |                  |       |      |       |      | 0.6 |      |   |                                            |
| 967              | <i>Zfp292</i>    | -3.81 | down | -2.00 | 0.00 | 1   | down |   | zinc finger protein 292                    |
| ENSMUSG000000028 |                  |       |      |       |      | 0.9 |      |   | family with sequence similarity 219,       |
| 439              | <i>Fam219a</i>   | 0.95  | up   | -1.71 | 0.01 | 8   | down |   | member A                                   |
| ENSMUSG000000045 |                  |       |      |       |      | 0.2 |      |   |                                            |
| 973              | <i>Slc25a51</i>  | -0.40 | down | 2.35  | 0.00 | 4   | up   |   | solute carrier family 25, member 51        |

|                 |                |       |      |       |      |     |      |                                            |
|-----------------|----------------|-------|------|-------|------|-----|------|--------------------------------------------|
| ENSMUSG00000053 |                |       |      |       |      | 0.9 |      |                                            |
| 841             | <i>Txlna</i>   | -0.46 | down | 1.71  | 0.01 | 7   | up   | taxilin alpha                              |
| ENSMUSG00000039 |                |       |      |       |      |     |      |                                            |
| 410             | <i>Prdm16</i>  | -0.16 | down | 1.58  | 0.02 | 1   | up   | PR domain containing 16                    |
| ENSMUSG00000029 |                |       |      |       |      |     |      | ski sarcoma viral oncogene homolog         |
| 050             | <i>Ski</i>     | 0.15  | up   | 1.46  | 0.03 | 1   | up   | (avian)                                    |
| ENSMUSG00000014 |                |       |      |       |      |     |      | YES proto-oncogene 1, Src family tyrosine  |
| 932             | <i>Yes1</i>    | -2.45 | down | -1.56 | 0.02 | 1   | down | kinase                                     |
| ENSMUSG00000061 |                |       |      |       |      | 0.4 |      | biorientation of chromosomes in cell       |
| 755             | <i>Bod1l</i>   | -3.03 | down | -2.18 | 0.00 | 2   | down | division 1-like                            |
| ENSMUSG00000038 |                |       |      |       |      |     |      |                                            |
| 538             | <i>Ubn2</i>    | -1.30 | down | -1.40 | 0.04 | 1   | down | ubinuclein 2                               |
| ENSMUSG00000030 |                |       |      |       |      |     |      |                                            |
| 016             | <i>Zfp638</i>  | -2.27 | down | -1.48 | 0.03 | 1   | down | zinc finger protein 638                    |
| ENSMUSG00000060 |                |       |      |       |      |     |      |                                            |
| 477             | <i>Irak2</i>   | -0.40 | down | 1.37  | 0.04 | 1   | up   | interleukin-1 receptor-associated kinase 2 |
| ENSMUSG00000007 | <i>Ankrd26</i> | -3.43 | down | -1.37 | 0.04 | 1   | down | ankyrin repeat domain 26                   |

827

ENSMUSG000000003

153

*Slc2a3*

-0.46 down

1.47 0.03

1 up

solute carrier family 2 (facilitated glucose transporter), member 3

ENSMUSG000000068

566

*Myadm*

-0.21 down

1.33 0.04

1 up

myeloid-associated differentiation marker

ENSMUSG000000054 *1600014C10*

676

*Rik*

0.46 up

1.35 0.04

1 up

RIKEN cDNA 1600014C10 gene

ENSMUSG000000033

904

*Ccp110*

-3.90 down

-1.70 0.01

1 down

centriolar coiled coil protein 110

ENSMUSG000000031

0.9

antigen identified by monoclonal antibody

004

*Mki67*

-0.83 down

-1.71 0.01

7 down

Ki 67

ENSMUSG000000036

990

*Otud4*

-1.80 down

-1.43 0.03

1 down

OTU domain containing 4

ENSMUSG000000049

305

*Ccdc71*

0.25 up

-1.62 0.02

1 down

coiled-coil domain containing 71

ENSMUSG000000041

268

*Dmxl2*

-1.52 down

-1.63 0.02

1 down

Dmx-like 2

|                 |                |       |      |       |      |     |      |                                       |
|-----------------|----------------|-------|------|-------|------|-----|------|---------------------------------------|
| ENSMUSG00000019 |                |       |      |       |      | 0.7 |      |                                       |
| 817             | <i>Plagl1</i>  | 0.58  | up   | -1.89 | 0.01 | 7   | down | pleiomorphic adenoma gene-like 1      |
| ENSMUSG00000003 |                |       |      |       |      | 0.6 |      |                                       |
| 226             | <i>Ranbp2</i>  | -1.64 | down | -1.99 | 0.00 | 1   | down | RAN binding protein 2                 |
| ENSMUSG00000035 |                |       |      |       |      | 0.0 |      |                                       |
| 370             | <i>Adat3</i>   | 0.11  | up   | -6.18 | 0.00 | 0   | down | adenosine deaminase, tRNA-specific 3  |
| ENSMUSG00000046 |                |       |      |       |      |     |      |                                       |
| 311             | <i>Zfp62</i>   | -1.42 | down | -1.51 | 0.03 | 1   | down | zinc finger protein 62                |
| ENSMUSG00000049 |                |       |      |       |      | 0.9 |      |                                       |
| 470             | <i>Aff4</i>    | -2.68 | down | -1.74 | 0.01 | 7   | down | AF4/FMR2 family, member 4             |
| ENSMUSG00000069 |                |       |      |       |      |     |      |                                       |
| 793             | <i>Slfn9</i>   | -1.29 | down | -1.65 | 0.02 | 1   | down | schlafen 9                            |
| ENSMUSG00000059 |                |       |      |       |      | 0.7 |      |                                       |
| 995             | <i>Atxn7l3</i> | -0.27 | down | 1.88  | 0.01 | 4   | up   | ataxin 7-like 3                       |
| ENSMUSG00000037 |                |       |      |       |      |     |      |                                       |
| 669             | <i>Ldah</i>    | 0.41  | up   | -1.38 | 0.04 | 1   | down | lipid droplet associated hydrolase    |
| ENSMUSG00000020 | <i>Rock2</i>   | -1.75 | down | -1.81 | 0.01 | 0.8 | down | Rho-associated coiled-coil containing |



|                 |               |       |      |       |      |     |      |                                                             |
|-----------------|---------------|-------|------|-------|------|-----|------|-------------------------------------------------------------|
| 580             |               |       |      |       |      | 6   |      | protein kinase 2                                            |
| ENSMUSG00000039 |               |       |      |       |      |     |      |                                                             |
| 219             | <i>Arid4b</i> | -4.32 | down | -1.56 | 0.02 | 1   | down | AT rich interactive domain 4B (RBP1-like)                   |
| ENSMUSG00000021 |               |       |      |       |      |     |      |                                                             |
| 413             | <i>Prpf4b</i> | -0.95 | down | -1.41 | 0.04 | 1   | down | pre-mRNA processing factor 4B                               |
| ENSMUSG00000006 |               |       |      |       |      |     |      |                                                             |
| 740             | <i>Kif5b</i>  | -0.94 | down | -1.48 | 0.03 | 1   | down | kinesin family member 5B<br>metastasis associated lung      |
| ENSMUSG00000092 |               |       |      |       |      | 0.1 |      | adenocarcinoma transcript 1 (non-coding<br>RNA)             |
| 341             | <i>Malat1</i> | -2.65 | down | -2.65 | 0.00 | 0   | down |                                                             |
| ENSMUSG00000024 |               |       |      |       |      | 0.5 |      |                                                             |
| 795             | <i>Kif20b</i> | -2.56 | down | -2.10 | 0.00 | 1   | down | kinesin family member 20B                                   |
| ENSMUSG00000040 |               |       |      |       |      |     |      |                                                             |
| 621             | <i>Gemin8</i> | -0.71 | down | 1.46  | 0.03 | 1   | up   | gem nuclear organelle associated protein 8                  |
| ENSMUSG00000036 |               |       |      |       |      | 0.7 |      | UPF3 regulator of nonsense transcripts<br>homolog B (yeast) |
| 572             | <i>Upf3b</i>  | -1.68 | down | -1.91 | 0.01 | 9   | down |                                                             |
| ENSMUSG00000056 | <i>Rlim</i>   | -1.39 | down | -1.62 | 0.02 | 1   | down | ring finger protein, LIM domain interacting                 |

537

ENSMUSG00000031

0.3

229            *Atrx*                    -2 down            -2.25 0.00        4 down            ATRX, chromatin remodeler

ENSMUSG00000023

0.0441

944            *Hsp90ab1*                -0.134 down            4 0.01        1 down            heat shock protein 90 alpha (cytosolic)

ENSMUSG00000022

0.1349 0.02

443            *Myh9*                    -0.153 down            7 3            1 down            myosin, heavy polypeptide 9, non-muscle

ENSMUSG00000032

- 0.00

294            *Pkm*                    0.153 down            0.1148 9            1 down            pyruvate kinase, muscle

---
